# Supplementary material for: Coagulation behavior and floc structure characteristics of cationic lignin-based polymer-polyferric chloride dual-coagulants under different coagulation conditions
Source: Royal Society of Chemistry journal article supplement (doi:10.1039/c5ra22637f), 2015-01-01
Supplement: c5ra22637f1.pdf [file c5ra22637f1.pdf]

**RSC advances**

***Supplementary Data***

**Coagulation behavior and floc structure characteristic of cationic  
lignin-based polymer-polyferric chloride dual-coagulants under  
different coagulation conditions**

Ruihua Li, Baoyu Gao\*, Shenglei Sun, Hui Wang, Yingxue Liu, Qinyan Yue, Yan Wang

Key laboratory of water pollution control and recycling (Shandong), School of  
Environmental Science and Engineering, Shandong University, Jinan 250100, PR  
China

\* Corresponding author:

Tel: +86-531-88366771

Fax: +86-531-88364513

E-mail address: bygao@sdu.edu.cn (B. Y. Gao)

5 Pages, 3 Figures

**Figure list:**

Fig. S1 Comparison of various LDA dosages profiles for removal ratio and zeta potential using PFC as coagulant.

Fig. S2 pH value of coagulated effluent under different coagulation conditions.

Fig. S3 Zeta potential of LDA and Lignin under different pH conditions.

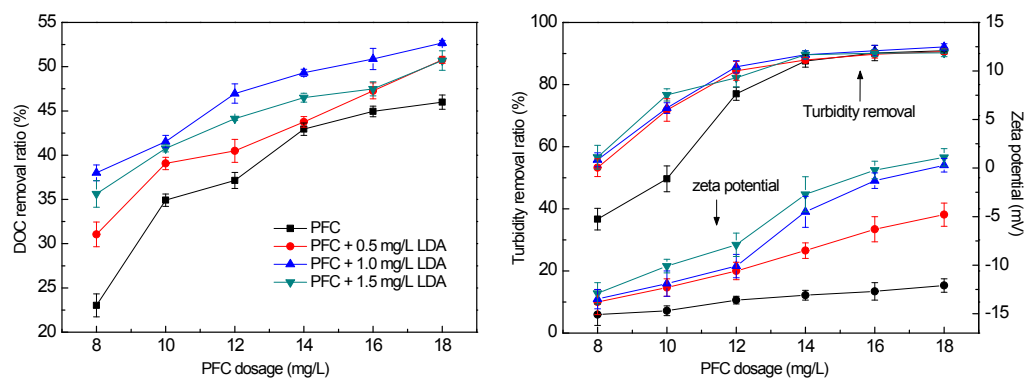

Fig. S1 Comparison of various LDA dosages profiles for removal ratio and zeta potential using PFC as coagulant.

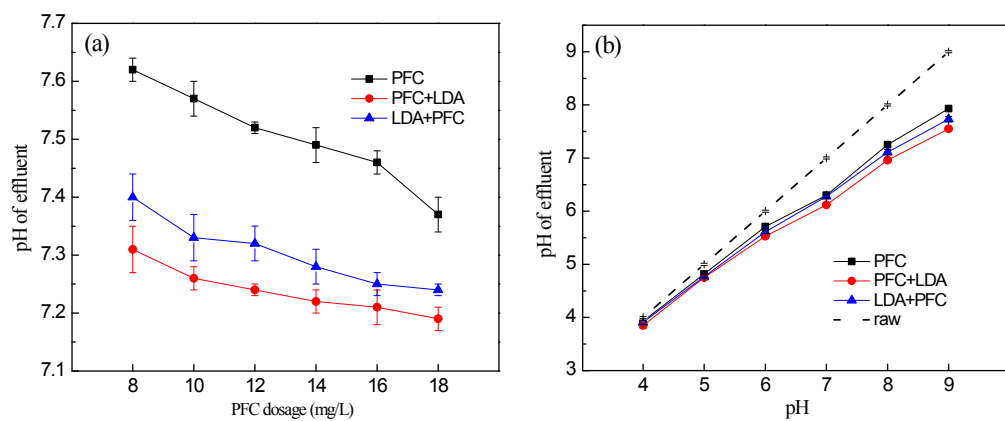

Fig. S2 pH value of coagulated effluent under different coagulation conditions: (a) PFC dosage; (b) Solution pH.

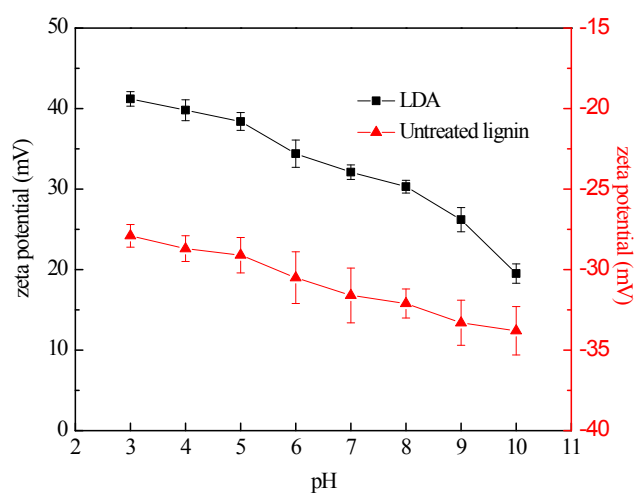

Fig. S3 Zeta potential of LDA and Untreated lignin under different pH conditions.
